# Supplementary material
Source: publisher figshare collection journal article supplement (https://sage.figshare.com/ndownloader/files/17497064)
Supplement: Supplementary file 1 [file 17497064]

## APPENDIX A

Appendix A. Statistics from Results of Hierarchical Logistic Regressions of Health Outcomes on Predictor and Control Variables<sup>1</sup>

|                                                       | Self-Rated Health | Obesity  | Cardiovascular Disease | Chronic Obstructive Pulmonary Disease | Depression | Difficulty Concentrating | Health Care too Expensive |
|-------------------------------------------------------|-------------------|----------|------------------------|---------------------------------------|------------|--------------------------|---------------------------|
| Null model                                            |                   |          |                        |                                       |            |                          |                           |
| Intraclass correlation coefficient (ICC)              | 0.010             | .008     | .010                   | .019                                  | .012       | .013                     | .016                      |
| Design effect                                         | 195.836           | 161.221  | 201.643                | 386.660                               | 231.985    | 252.985                  | 321.631                   |
| Effective sample size                                 | 4874.839          | 5921.521 | 4374.455               | 2469.020                              | 4115.234   | 3773.622                 | 2968.219                  |
| ICCs of models with additional variables              |                   |          |                        |                                       |            |                          |                           |
| Individual controls                                   | .003              | .006     | .005                   | .006                                  | .006       | .005                     | .005                      |
| Individual and state-level controls                   | .002              | .003     | .003                   | .004                                  | .004       | .004                     | .001                      |
| Individual and state controls, and Gini               | .002              | .003     | .003                   | .004                                  | .003       | .004                     | .003                      |
| Individual and state controls, and overall uniformity | .002              | .003     | .003                   | .004                                  | .004       | .004                     | .003                      |
| Individual and state controls, and high uniformity    | .002              | .003     | .002                   | .004                                  | .004       | .004                     | .002                      |
| Individual and state controls, and low uniformity     | .002              | .003     | .003                   | .004                                  | .004       | .003                     | .003                      |

<sup>1</sup> n=954,671/48. ICC is the intraclass correlation coefficient. All models utilize sampling weights. Individual controls include age, gender, race, education, income, relationships status, health insurance, and health behaviors (exercise in past 30 days, current smoker, and reported binge drinking). State-level controls include median household income, the percent with health insurance, and the percent on SNAP. The random component of the intercept is significant at the .001 level, two-tailed, in all models.
